# Supplementary material for: Effects on heart function of neoadjuvant chemotherapy and chemoradiotherapy in patients with cancer in the esophagus or gastroesophageal junction – a prospective cohort pilot study within a randomized clinical trial
Source: Springer Nature journal article supplement (doi:10.1186/s13014-014-0310-7), 2015-01-12
Supplement: MOESM1 [file 9773632]

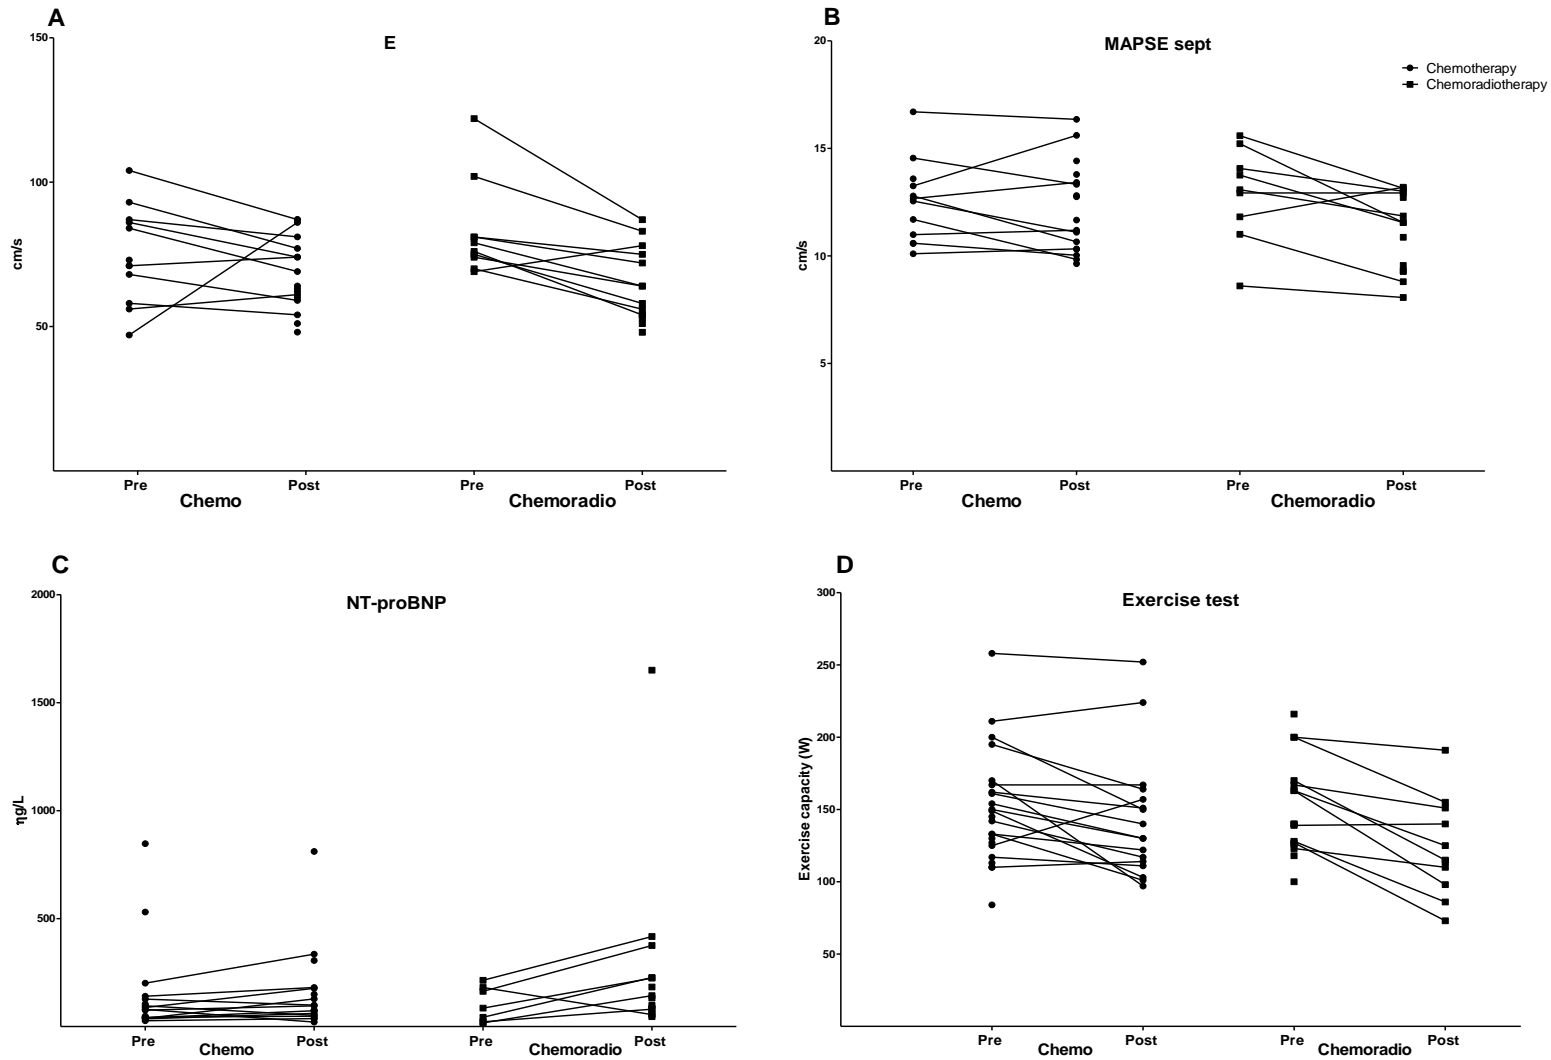

**Fig 1.** Scatterplots of E (A), MAPSE sept (B), NT-proBNP (C) and exercise test (D) pre and post neoadjuvant treatment. Lines are connecting paired measurements
